# Supplementary material for: Postoperative Chemoradiotherapy versus Radiotherapy Alone in Major Salivary Gland Cancers: A Stratified Study Based on the External Validation of the Distant Metastasis Risk Score Model
Source: MDPI journal article supplement (doi:10.3390/cancers14225583), 2022-11-14

Supplementary material Table S1 Histology of the salivary gland carcinoma in the entire cohort

|                                  | <b>FUSCC cohort (n=586, %)</b> |
|----------------------------------|--------------------------------|
| <b>Histology</b>                 |                                |
| Lymphoepithelial carcinoma (LEC) | 147 (25.1)                     |
| Adenoid cystic carcinoma (ACC)   | 125 (21.3)                     |
| Mucoepidermoid carcinoma (MEC)   | 81 (13.8)                      |
| Salivary duct carcinoma (SDC)    | 79 (13.5)                      |
| Acinic cell carcinoma            | 37 (6.3)                       |
| Carcinoma ex-pleomorphic adenoma | 25 (4.3)                       |
| Adenocarcinoma                   | 18 (3.1)                       |
| Secretory carcinoma              | 13 (2.2)                       |
| Carcinoma NOS                    | 26 (4.4)                       |
| Myoepithelial carcinoma          | 18 (3.1)                       |
| Small cell carcinoma             | 8 (1.4)                        |
| Basal cell adenocarcinoma        | 6 (1.0)                        |
| Carcinosarcoma                   | 3 (0.5)                        |

In the cases with LEC, Epstein-Barr virus was positive in 71 patients, negative in 30 cases and unknown in 46 cases. The carcinoma ex-pleomorphic adenoma was consisted of 13 patients with high-grade SDC, and 12 myoepithelial carcinoma cases.

Supplementary material Table S2 Histological subtypes in the RT and CRT group

|                         | RT<br>(n=519, %) | CRT<br>(n=67, %) | P-value |
|-------------------------|------------------|------------------|---------|
| Pathological subtype    |                  |                  | <0.001  |
| LEC                     | 120 (23.1)       | 27 (40.3)        |         |
| ACC                     | 122 (23.5)       | 3 (4.5)          |         |
| MEC                     | 80 (15.4)        | 1 (1.5)          |         |
| SDC                     | 66 (12.7)        | 13 (19.4)        |         |
| Acinic cell carcinoma   | 37 (7.1)         | 0 (0)            |         |
| ex-pleomorphic adenoma  | 22 (4.2)         | 3 (4.5)          |         |
| Adenocarcinoma          | 13 (2.5)         | 5 (7.5)          |         |
| Secretory carcinoma     | 13 (2.5)         | 0 (0)            |         |
| Carcinoma NOS           | 20 (23.1)        | 6 (9.0)          |         |
| Myoepithelial carcinoma | 15 (2.9)         | 3 (4.5)          |         |
| Other                   | 11 (2.1)         | 6 (9.0)          |         |

Supplementary Figure S1 Overall survival comparison between RT and CRT group in the LEC and SDC subtype

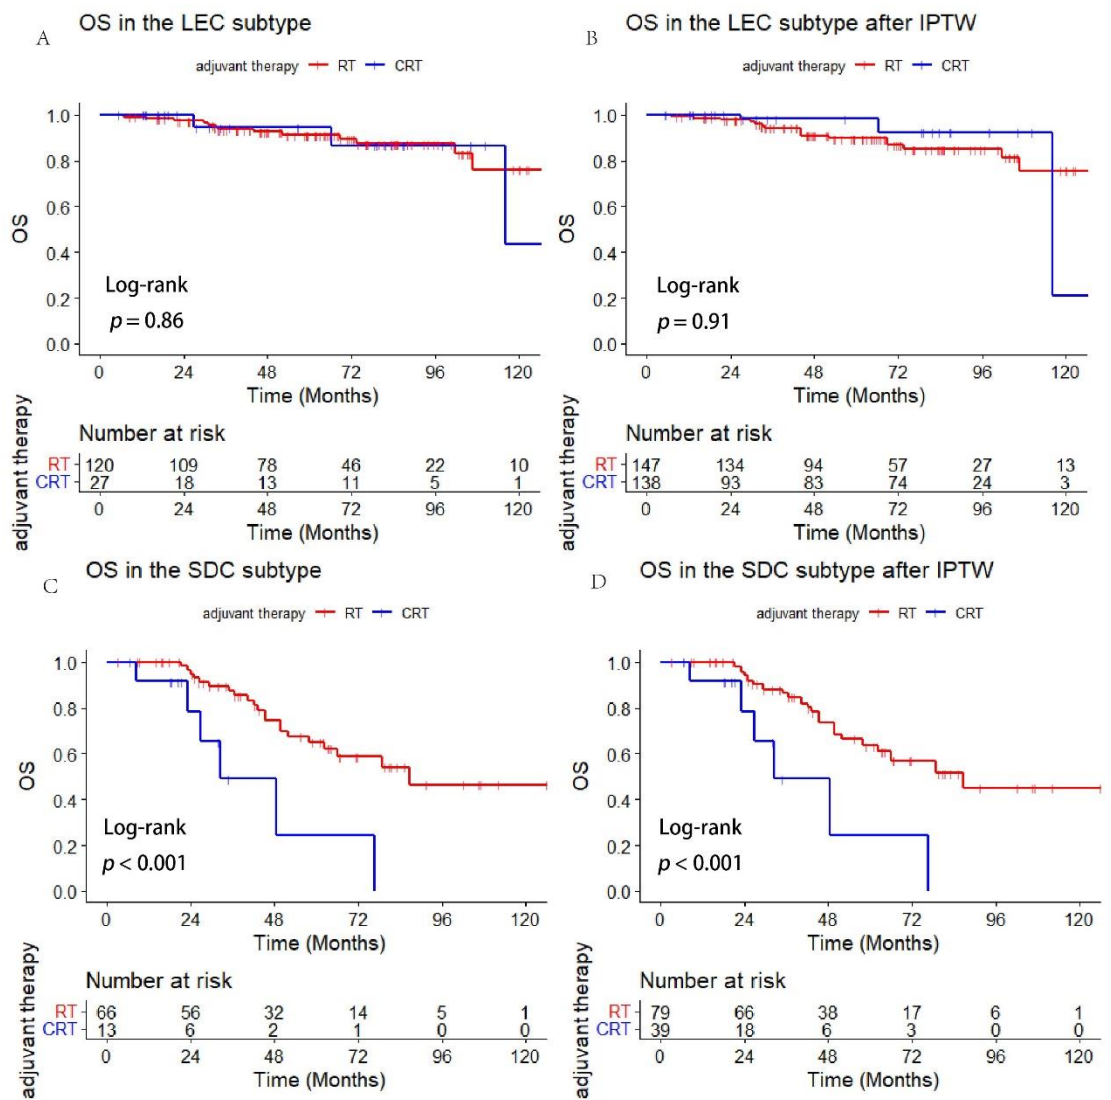

Supplement: s1 [file s1]
